# Supplementary material
Source: MDPI journal article supplement (https://www.mdpi.com/2076-3417/13/3/1990)
Supplement: s1 [file s1]

## Supplementary Materials

# Exploring Effective Bio-Cover Materials for Mitigating Methane Emission at a Tropical Landfill

Rathborey Chan, Wilai Chiemchaisri and Chart Chiemchaisri \*

Department of Environmental Engineering, Faculty of Engineering, Kasetsart University, 50 Ngam  
Wong Wan Road, Bangkok 10900, Thailand

**Table S1.** Probes used in microbial population identification.

| Probes     | Sequence 5'-3'                   | Target bacteria                                                                 | Tm | %FA |
|------------|----------------------------------|---------------------------------------------------------------------------------|----|-----|
| Mg705      | CTG GTG TTC CTT<br>CAG ATC       | type I methanotrophs                                                            | 54 | 20  |
| Mg84       | CCA CTC GTC AGC<br>GCC CGA       | type I methanotrophs                                                            | 62 | 20  |
| MA450      | ATC CAG GTA CCG<br>TCA TTA TC    | type II methanotrophs                                                           | 58 | 20  |
| Mcaps-1032 | CAC CTG TGT CCC<br>TGG CTC       | Methylocapsa acidiphila                                                         | 60 | 0   |
| Mcell-181  | GTT CTC GCC ACC<br>CGA AGT       | Methylocella palustris                                                          | 58 | 0   |
| NIT3       | CCT GTG CTC CAT<br>GCT CCG       | Nitrobacter spp.                                                                | 60 | 40  |
| Nsm156     | TAT TAG CAC ATC<br>TTT CGA T     | Nitrosomonas spp.                                                               | 50 | 5   |
| Amx820     | AAA ACC CCT CTA<br>CTT AGT GCC C | Candidatus 'Brocadia anammoxidans' and<br>Candidatus 'Kuenenia stuttgartiensis' | 53 | 40  |
| MSMX860    | GGC TCG CTT CAC<br>GGC TTC CCT   | Methanosarcinales (all Methanosarcina and<br>Methanosaeta)                      | 63 | 45  |

**Table S2.** Moisture content (%) in bio-cover material.

| Media | Depth (m) | Sep  | Oct  | Nov  | Dec  | Jan  | Feb  |
|-------|-----------|------|------|------|------|------|------|
| SL    | 0-0.20    | 56   | 52.1 | 56.2 | 25   | 20   | 23.4 |
|       | 0.20-0.40 | 63   | 56.3 | 62.1 | 28   | 26   | 29.5 |
|       | 0.40-0.60 | 65   | 60.5 | 68.5 | 35   | 31   | 35   |
| C     | 0-0.20    | 65   | 58.6 | 60.3 | 55.1 | 57   | 53   |
|       | 0.20-0.40 | 68.9 | 62.1 | 65.1 | 58   | 60   | 56   |
|       | 0.40-0.60 | 69   | 68.3 | 71.2 | 61   | 65.2 | 60   |
| SW    | 0-0.20    | 32   | 39.1 | 38.2 | 27   | 25   | 19   |
|       | 0.20-0.40 | 40.2 | 45.2 | 43.5 | 33   | 27   | 21.5 |
|       | 0.40-0.60 | 49   | 49.4 | 52.1 | 35   | 32   | 31.2 |

**Table S3.** Bio-cover material characteristics.

| Media                                  | Week 0 | Week 24  |             |             |
|----------------------------------------|--------|----------|-------------|-------------|
|                                        |        | 0-0.20 m | 0.20-0.40 m | 0.40-0.60 m |
| Sandy loam (SL)                        |        |          |             |             |
| Ph                                     | 7.27   | 6.56     | 6.2         | 6.04        |
| EC (μs/cm)                             | 1766   | 1380     | 157         | 162         |
| NH <sub>4</sub> <sup>+</sup> (mg N/kg) | 1.38   | 0.86     | 1.03        | 1.29        |
| NO <sub>3</sub> <sup>-</sup> (mg N/kg) | 16.35  | 62.52    | 34.91       | 6.53        |
| TOC (% dry wt.)                        | 0.6    | 0.56     | 0.45        | 0.5         |
| Compost (C)                            |        |          |             |             |
| pH                                     | 7.12   | 6.51     | 6.3         | 6.02        |
| EC (μs/cm)                             | 1206   | 65.4     | 147.6       | 355         |
| NH <sub>4</sub> <sup>+</sup> (mg N/kg) | 4.74   | 0.78     | 0.86        | 0.95        |
| NO <sub>3</sub> <sup>-</sup> (mg N/kg) | 5.54   | 55.9     | 33.96       | 8.78        |
| TOC (% dry wt.)                        | 30     | 15.3     | 17.52       | 16.95       |
| Stabilized wastes (SW)                 |        |          |             |             |
| pH                                     | 6.8    | 6.4      | 6.55        | 6.5         |
| EC (μs/cm)                             | 285    | 98.2     | 80.6        | 65.4        |
| NH <sub>4</sub> <sup>+</sup> (mg N/kg) | 0.6    | 0.43     | 0.78        | 0.79        |
| NO <sub>3</sub> <sup>-</sup> (mg N/kg) | 57.93  | 20.45    | 25.45       | 88.56       |
| TOC (% dry wt.)                        | 71.13  | 65.7     | 69.5        | 68.56       |

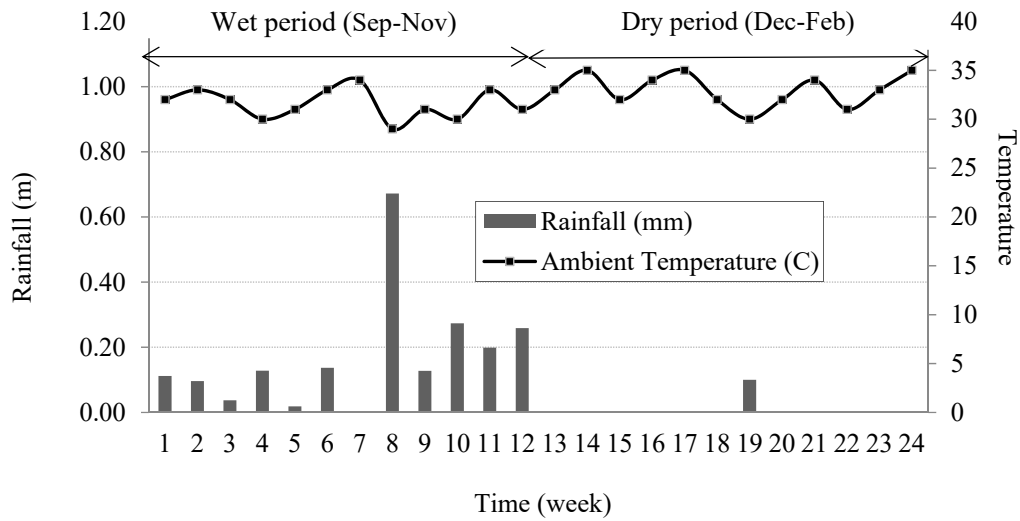

**Figure S1.** Variation of rainfall and ambient temperature.

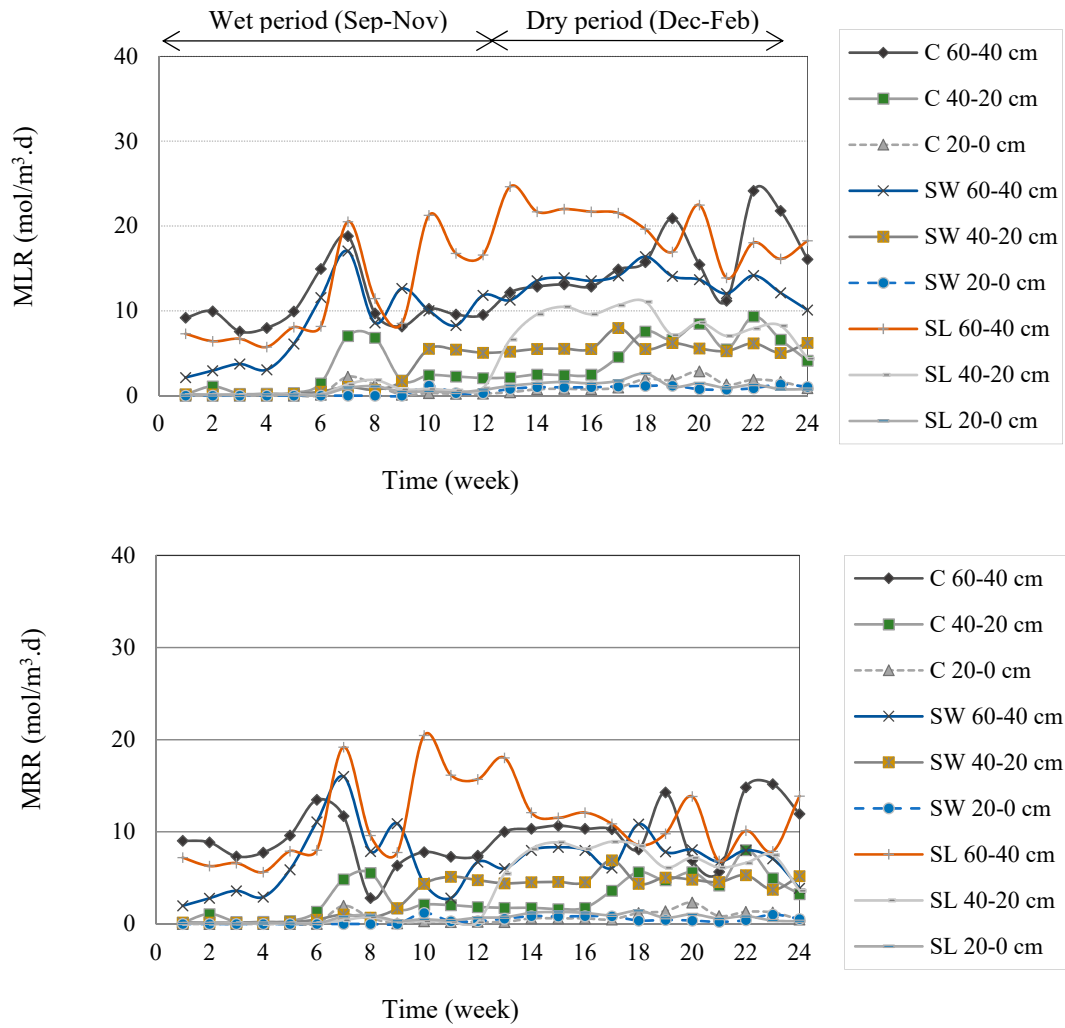

**Figure S2.** Variation of methane loadings (MLRs) and removals (MRRs) during bio-cover operation.

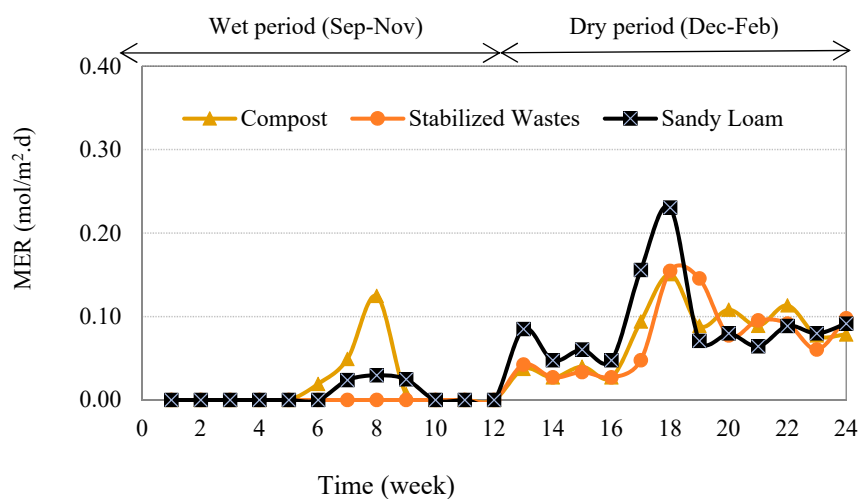

**Figure S3.** Variation of methane emissions (MERs) during bio-cover operation.

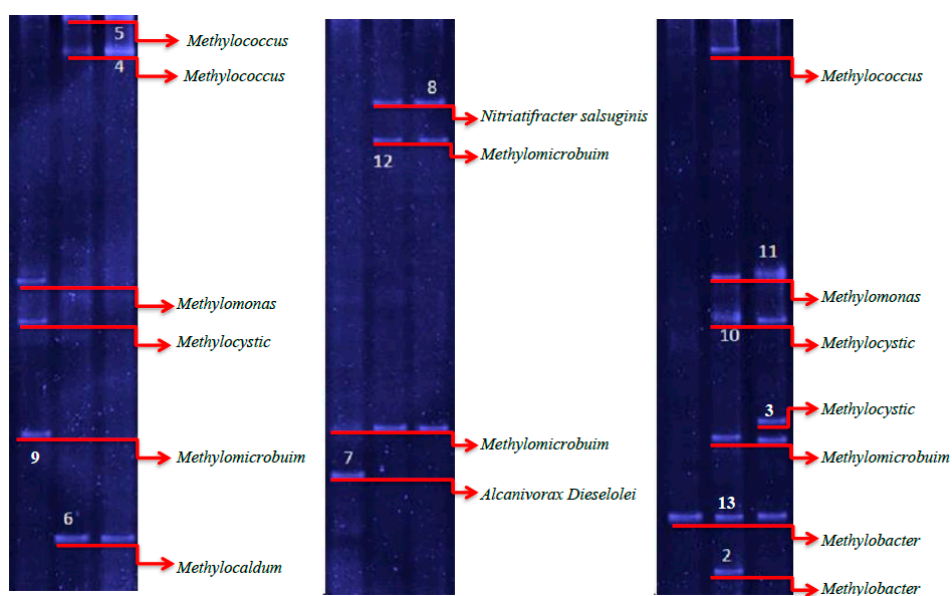

**Figure S4.** PCR-DGGE profiles of methanotrophic population observed in different materials (left) C (middle) SW (right) SL media.
